# Supplementary material for: Tracing QTLs for Leaf Blast Resistance and Agronomic Performance of Finger Millet (Eleusine coracana (L.) Gaertn.) Genotypes through Association Mapping and in silico Comparative Genomics Analyses
Source: PubMed Central journal article supplement (PMC4944987; doi:10.1371/journal.pone.0159264), 2016-07-14
Supplement: pone.0159264.s002.pdf [file pone.0159264.s002.pdf]

**Table A.** List of 87 genomic SSR primers with primer sequence (5' to 3'), SSR motif and size of markers (bp) used for the analysis of population structure of 128 finger millet genotypes

| Name of the primer | Primer sequence (5' to 3')                               | SSR motif                                            | Size of markers (bp) |
|--------------------|----------------------------------------------------------|------------------------------------------------------|----------------------|
| SSR-01             | (F) GCGAAAACACAATGCAAAAA<br>(R) GCGTTGGTTGGACCTGAC       | (AC) <sub>19</sub> (AT) <sub>29</sub>                | 400                  |
| SSR-02             | (F) TCCTCCCTCCCTTCGCCACTG<br>(R) CGATGTTCCGCATGGCAGCGACC | (GA) <sub>26</sub>                                   | 1000                 |
| SSR-06             | (F) GCCTCGAGCATCATCATCAG<br>(R) ATCAACCTGCACTTGCCCTGG    | (TC) <sub>22</sub> TT(GT) <sub>19</sub>              | 700                  |
| SSR-08             | (F) TTCCCTGTAAAGAGAGAAATC<br>(R) GTGTATTTGGTGAAAGCAAC    | (GA) <sub>17</sub> AA(GA) <sub>19</sub>              | 600                  |
| SSR-10             | (F) CTTTGTCTATCTCAAGACAC<br>(R) TTGCAGATGTTCTTCCTGATG    | (GA) <sub>14</sub>                                   | 500                  |
| UGEP1              | (F) TTCAGTGGTGACGGAAGTTCT<br>(R) GGCTCCATGAAGAGCTTGAC    | (TC) <sub>11</sub>                                   | 233                  |
| UGEP3              | (F) CCACGAGGCCATACTGAATAG<br>(R) GATGGCCACTAGGGATGTTG    | (CA) <sub>7</sub> N <sub>12</sub> (GA) <sub>15</sub> | 206                  |
| UGEP5              | (F) TGTACACAACACCACACTGATG<br>(R) TTGTTTGGACGTTGGATGTG   | (TC) <sub>12</sub> AC(TC) <sub>4</sub>               | 215                  |
| UGEP6              | (F) AGCTGCAGTTTCAGTGGATTC<br>(R) TCAACAAGGTGAAGCAGAGC    | (GA) <sub>3</sub> TA(GA) <sub>9</sub>                | 229                  |
| UGEP8              | (F) ATTTCCGCCATCACTCCAC<br>(R) AGACGCAAATGGGTAAATGTC     | (GA) <sub>13</sub>                                   | 297                  |
| UGEP10             | (F) AAACGCGATGAATTTTAAGCTC<br>(R) CTATGTCTGTCCCATGTCTG   | (GA) <sub>19</sub>                                   | 400                  |
| UGEP11             | (F) CCTCGAGTGGGGATCCAG<br>(R) AAGACGCTGGTGGAAATAGC       | (CT) <sub>12</sub>                                   | 153                  |
| UGEP12             | (F) ATCCCCACCTACGAGATGC<br>(R) TCAAAGTGATGCGTCAGGTC      | (CT) <sub>22</sub>                                   | 230                  |
| UGEP15             | (F) AAGGCAATCTCGAATGCAAC<br>(R) AAGCCATGGATCCTTCCTTC     | (CT) <sub>22</sub>                                   | 180                  |
| UGEP18             | (F) TTGCATGTGTTGCTTTTTGC<br>(R) TGTTCCTTGATTGCAAACCTGATG | (CT) <sub>12</sub>                                   | 318                  |
| UGEP21             | (F) CAATGATGTCATTGGGACAAC<br>(R) GTATCCACCTGCATGCCAAC    | (GA) <sub>16</sub>                                   | 225                  |
| UGEP24             | (F) GCCTTTTGATTGTTCAACTCG<br>(R) CGTGATCCCTCTCCTCTCTG    | (GA) <sub>26</sub>                                   | 183                  |

| Name of the primer | Primer sequence (5' to 3')                             | SSR motif                             | Size of markers (bp) |
|--------------------|--------------------------------------------------------|---------------------------------------|----------------------|
| UGEP26             | (F) ATGGGGTTAGGGTTCGAGTC<br>(R) TGTCCCTCACTCGTCTCCTC   | (CGG) <sub>7</sub>                    | 227                  |
| UGEP31             | (F) ATGTTGATAGCCGAAATGG<br>(R) CCGTGAGCCTCGAGTTTTAG    | (GA) <sub>12</sub>                    | 241                  |
| UGEP52             | (F) TCATGCTAGCTTCAACACAACC<br>(R) TGCTGGGTGAAACCCTAGAC | (GA) <sub>16</sub>                    | 215                  |
| UGEP53             | (F) TGCCACAACGTCAACAAAAG<br>(R) CCTCGATGGCCATTATCAAG   | (AG) <sub>26</sub>                    | 226                  |
| UGEP56             | (F) CTCCGATACAGGCGTAAAGG<br>(R) ACCATAATAGGGCCGCTTG    | (GT) <sub>12</sub>                    | 162                  |
| UGEP60             | (F) AGCTCTGCTTGGTGGAGAAG<br>(R) TTTTCTACTGGTGGGCGAAG   | (GA) <sub>37</sub>                    | 240                  |
| UGEP65             | (F) AGTGCTAGCTTCCCATCAGC<br>(R) ACCGAAACCCTTGTCAGTTC   | (CT) <sub>19</sub>                    | 226                  |
| UGEP68             | (F) CGGTCAGCATATAACGAATGG<br>(R) TCATTGATGAATCCGACGTG  | (CT) <sub>14</sub>                    | 232                  |
| UGEP76             | (F) GCACGTACGGATTACATTG<br>(R) GGTACGGAGACATCGACACC    | (CAG) <sub>7</sub>                    | 168                  |
| UGEP77             | (F) TTCGCGCGAAATATAGGC<br>(R) CTCGTAAGCACCCACCTTTC     | (CT) <sub>19</sub>                    | 245                  |
| UGEP78             | (F) AAGCAATCAACAAAGCCTTTTC<br>(R) TACAACGTCCAGGCAACAAG | (GA) <sub>14</sub>                    | 244                  |
| UGEP81             | (F) AAGGGCCATACCAACTCC<br>(R) CACTCGAGAACCGACCTTTG     | (GT) <sub>12</sub>                    | 192                  |
| UGEP90             | (F) GGCTTTGCAGTCATGTGAG<br>(R) CGACTCCAGGTGTTGTTGG     | (CT) <sub>11</sub> /(CT) <sub>8</sub> | 232                  |
| UGEP102            | (F) ATGCAGCCTTTGTCATCTCC<br>(R) GATGCCTTCCTTCCCTTCTC   | (TG) <sub>17</sub>                    | 184                  |
| UGEP104            | (F) TCAGCACCACTGAATAGG<br>(R) AATAGGGAGGGCGAAGACTC     | (CT) <sub>11</sub>                    | 189                  |
| UGEP106            | (F) AATTCCATTCTCTCGCATCG<br>(R) TGCTGTGCTCCTCTGTTGAC   | (AC) <sub>12</sub>                    | 175                  |
| UGEP107            | (F) TCATGCTCCATGAAGAGTGTG<br>(R) TGTCAAAAACCGGATCCAAG  | (GA) <sub>15</sub>                    | 224                  |
| UGEP108            | (F) GTTGGCTGCTCTGCTTATCC<br>(R) TATCTGCTTGTGCAGCTTCG   | (CTG) <sub>6</sub> (CAG) <sub>2</sub> | 150                  |
| UGEP110            | (F) AAATTCGCATCCTTGCTGAC<br>(R) TGACAAGAGCACACCGACTC   | (CT) <sub>12</sub>                    | 192                  |

| Name of the primer | Primer sequence (5' to 3')                              | SSR motif                             | Size of markers (bp) |
|--------------------|---------------------------------------------------------|---------------------------------------|----------------------|
| UGEP7              | (F) GCCAACAGTTCGCTCTGC<br>(R) CTGTCTCCCGTTCTCTCCTG      | (GA) <sub>14</sub>                    | 500                  |
| UGEP9              | (F) GGTGGAGAAGGGAGAAGGAG<br>(R) TTGAAGGCCCAATAGCTACG    | (GGA) <sub>7</sub>                    | 239                  |
| UGEP13             | (F) AGCACGATCGAAATCCATTC<br>(R) AGATCTCGCAGCGGTTTATG    | (TC) <sub>18</sub>                    | 206                  |
| UGEP16             | (F) TCTCCAGCTACATATGTTTTACT<br>(R) ATATATGGGACAACCATCCA | (CT) <sub>14</sub> (AT) <sub>16</sub> | 197                  |
| UGEP17             | (F) CATTGGTGTCTGTTCACTTGG<br>(R) TGCACCGTATGAGCAACAAG   | (GTT) <sub>7</sub>                    | 218                  |
| UGEP19             | (F) GGCAAGGATACCTTCATTCG<br>(R) TACCTCTGCTCTGCACATGG    | (GA) <sub>18</sub>                    | 230                  |
| UGEP20             | (F) GGGGAAGGCAATGATATGTG<br>(R) TTGGGGAGTGCCAACAATAC    | (GA) <sub>20</sub>                    | 153                  |
| UGEP22             | (F) ACAGAGACACGGTGGAGGTG<br>(R) CACCATGTCATCGTCACCAG    | (TC) <sub>29</sub>                    | 227                  |
| UGEP25             | (F) GTTCGGCCTCATCGTCAG<br>(R) TTTATCCGACGTGACAGGTG      | G <sub>8</sub> (GA) <sub>19</sub>     | 292                  |
| UGEP27             | (F) TTGCTCTGAGGTTGTGTTGC<br>(R) TCAAGCATAGTGCCCTCCTC    | (GA) <sub>19</sub>                    | 247                  |
| UGEP28             | (F) GAAGTTGCCATCCATGCTTC<br>(R) AGGAACCGCCAGGAAATTAG    | (TC) <sub>17</sub>                    | 228                  |
| UGEP29             | (F) TACCATTCCATTGCATCCAC<br>(R) TTAATTAGCACTTGGGCATGG   | (CT) <sub>12</sub>                    | 234                  |
| UGEP33             | (F) TAGCCCGTTTGCTTGTTTTG<br>(R) AAGGCCCTAGAACGTCAAGC    | (TC) <sub>18</sub>                    | 216                  |
| UGEP34             | (F) AAGATCCTCACACGCAAACAC<br>(R) ACCCTCAACTGGTGCCATAG   | (CA) <sub>12</sub>                    | 196                  |
| UGEP45             | (F) GGTCTCTTCAAAGCCACTGC<br>(R) AACCAACCAATCCCAATATCC   | (GA) <sub>13</sub>                    | 216                  |
| UGEP46             | (F) CAAGTCAAACATTCAGATGG<br>(R) CCACTCCATTGTAGCGAAAC    | (GA) <sub>14</sub>                    | 163                  |
| UGEP47             | (F) ACAGGCCCCATAAATTCCAC<br>(R) CCCCAATCATTCTTGATATGC   | (GA) <sub>18</sub>                    | 198                  |
| UGEP50             | (F) CACCCAGACATGACCCTTTC<br>(R) ACTAGTGCAGGGTGGTCTCG    | (CAA) <sub>7</sub>                    | 249                  |
| UGEP51             | (F) CAGCAGCACGACTGACCTG<br>(R) TGCCACCTGACTACTCTCTGC    | (GT) <sub>11</sub>                    | 299                  |

| Name of the primer | Primer sequence (5' to 3')                             | SSR motif                              | Size of markers (bp) |
|--------------------|--------------------------------------------------------|----------------------------------------|----------------------|
| UGEP54             | (F) ACATTCCTGTTTCGGGTTCTG<br>(R) TCGTGCACCATAACCAATAGC | (GTT) <sub>8</sub>                     | 222                  |
| UGEP57             | (F) CCATGGGTTTCATCAAACACC<br>(R) ACATGAGCTCGCGTATTGC   | (AG) <sub>16</sub>                     | 445                  |
| UGEP58             | (F) CATGGTGGTGGAGAGAAACC<br>(R) GCAATGGTGACATTGAGCTG   | (CA) <sub>15</sub>                     | 194                  |
| UGEP59             | (F) ACGTGCTACGAGTGCTTGTG<br>(R) AAACCCTAAGCCCCTCAATC   | (GA) <sub>11</sub>                     | 248                  |
| UGEP62             | (F) GTGTGACGTGGCATACTTGG<br>(R) CACGCGAGGTAGGGTAGAAG   | (TC) <sub>13</sub>                     | 194                  |
| UGEP64             | (F) GTCACGTCGATTGGAGTGTG<br>(R) TCTCACGTGCATTTAGTCATTG | (CT) <sub>23</sub>                     | 206                  |
| UGEP66             | (F) CAGATCTGGGTAGGGCTGTC<br>(R) GATGGTGGTTCATGCCAAC    | (AG) <sub>29</sub>                     | 219                  |
| UGEP67             | (F) CTCCTGATGCAAGCAAGGAC<br>(R) AGGTGCCGTAGTTTGTGCTC   | (TC) <sub>22</sub> TT(GT) <sub>5</sub> | 229                  |
| UGEP69             | (F) GCATGAGCGGGAGAATAAAG<br>(R) AGCTAGCCAGAAGGCATGAG   | (GT) <sub>9</sub> AT(GT) <sub>7</sub>  | 171                  |
| UGEP70             | (F) TGTTGTCGCTGGACTCGTAG<br>(R) AACCACACCCGGTTCCTC     | (TCC) <sub>7</sub>                     | 235                  |
| UGEP73             | (F) GGTCAAAGAGCTGGCTATCG<br>(R) ACCAGAACCGAATCATGAGG   | (CT) <sub>4</sub> CC(CT) <sub>10</sub> | 229                  |
| UGEP74             | (F) AGATCTGGCACCCATTTCC<br>(R) AGTCATCGGGGAGGGAAG      | (CT) <sub>21</sub>                     | 223                  |
| UGEP75             | (F) GCATTGGACGAAATAAATTGG<br>(R) GCAAATGTGCATGGTAGCAC  | (AC) <sub>19</sub> (AT) <sub>29</sub>  | 400                  |
| UGEP79             | (F) CCACTTTGCCGCTTGATTAG<br>(R) TGACATGAGAAGTGCCTTGC   | (CT) <sub>12</sub>                     | 173                  |
| UGEP80             | (F) TCCTGATCATCCTCATCATCC<br>(R) CCACTGTTTGAGCATGTTGG  | (CAT) <sub>7</sub>                     | 185                  |
| UGEP83             | (F) TAAGCTACGGCAGCGTCAG<br>(R) TCTACGCGTACGTGACCATC    | (GA) <sub>26</sub>                     | 194                  |
| UGEP84             | (F) GGAACTTCCGTCAGTCCTTG<br>(R) TGGGGAAGGTGTTGAATCTC   | (CT) <sub>24</sub>                     | 195                  |
| UGEP86             | (F) ACTCCCCTCACTCCCACAC<br>(R) CAGCCACCCTTGGACATC      | (CCT) <sub>8</sub>                     | 222                  |
| UGEP87             | (F) CTTCCCCGGACAAAGTGAAC<br>(R) AAGAGACAAGGCAGGGGAAG   | (TC) <sub>39</sub>                     | 152                  |

| Name of the primer | Primer sequence (5' to 3')                           | SSR motif                              | Size of markers (bp) |
|--------------------|------------------------------------------------------|----------------------------------------|----------------------|
| UGEP88             | (F) ACCTTGATCAGGGGTGCTC<br>(R) TTTTGAGTTTGCTCCCATGAC | (CT) <sub>20</sub> CC(CT) <sub>8</sub> | 227                  |
| UGEP91             | (F) GTGGCGAGAGAGGATGATTC<br>(R) TTCTCTAGCACGGCTTCACC | (AC) <sub>8</sub> (AG) <sub>14</sub>   | 236                  |
| UGEP93             | (F) TGGCCTCGTTAGGTGAAGTC<br>(R) AGCACCAAACTCCACAAC   | (TC) <sub>21</sub>                     | 174                  |
| UGEP95             | (F) AGGGGACGCTTGTTATTTG<br>(R) GCCTCTACCTGTCTCC GTTG | (TC) <sub>14</sub>                     | 208                  |
| UGEP96             | (F) TAATGGGCCTAATGGCAATG<br>(R) CAAAATCCGAGCCAAGATTC | (CT) <sub>10</sub>                     | 211                  |
| UGEP97             | (F) TTGAGCAAGGCTCCTCCTAC<br>(R) TCAACTCCTCAACCCTTTGG | (GT) <sub>8</sub> TT(GT) <sub>13</sub> | 231                  |
| UGEP98             | (F) GTCTTCCATTTGCAGCAACC<br>(R) ACGCGTACTGACGTGCTTG  | (GCC) <sub>8</sub>                     | 223                  |
| UGEP100            | (F) TCAAGTGTCTTCTGGCACTCG<br>(R) TGCAAAAGCTGGGAGTAAC | (CT) <sub>12</sub>                     | 223                  |
| UGEP101            | (F) GCTCACTTACCCATGGCTTC<br>(R) GAAATGTGGGGCACATAAGG | (GA) <sub>7</sub> AA(GA) <sub>19</sub> | 234                  |
| UGEP103            | (F) AGGGATGTCTTCAGCATTGG<br>(R) ACCGTGCACCATATCAACAG | (GTT) <sub>8</sub>                     | 239                  |
| UGEP105            | (F) CTCCCGCTGTCCCATATTAC<br>(R) TTTCTCCAGCCACAAAGGAC | (GA) <sub>20</sub>                     | 161                  |
| UGEP109            | (F) ACGCGACTTTGACCTGCTAC<br>(R) AAAAGGACGGGAAAGGAGAG | (GA) <sub>13</sub>                     | 208                  |
| UGEP111            | (F) CTCTCCCTGAGTTGGTCTGC<br>(R) TTGGTCAGAAGCATCAGGTG | (GAT) <sub>11</sub>                    | 160                  |

**Table B.** Agronomic performance and percentage of disease incidences (PDI) of the 128 finger millet genotypes; the data was collected after 45 and 90 days of sowing the seeds for PDI and agronomic traits respectively

| Name of genotype | PDI (%) | Plant height (cm) | Number of tillers / plant | Number of productive tillers / plan | Number of fingers / head | Length of fingers (cm) | Length of leaf (cm) | Length of root (cm) | Total seed yield (gm) | Cumulative rank | Empirical classification |
|------------------|---------|-------------------|---------------------------|-------------------------------------|--------------------------|------------------------|---------------------|---------------------|-----------------------|-----------------|--------------------------|
| APSSK1           | 18.4    | 63.67             | 1.00                      | 1.00                                | 5.66                     | 3.67                   | 18.80               | 14.83               | 1.50                  | 873.5           | S + PAT                  |
| CO11             | 34.4    | 81.00             | 2.33                      | 1.67                                | 5.66                     | 7.33                   | 25.67               | 18.67               | 2.25                  | 510             | S + PAT                  |
| CO12             | 21.6    | 70.00             | 2.67                      | 2.00                                | 5.00                     | 7.03                   | 26.33               | 21.17               | 1.21                  | 513.5           | S + PAT                  |
| CO14             | 3.2     | 80.30             | 1.96                      | 1.44                                | 7.30                     | 7.50                   | 34.00               | 19.00               | 5.50                  | 299             | R +GAT                   |
| CO7              | 24      | 58.50             | 2.00                      | 1.67                                | 4.33                     | 3.87                   | 23.67               | 16.50               | 1.30                  | 793.5           | S + PAT                  |
| CO9              | 35.2    | 65.00             | 2.00                      | 2.00                                | 5.33                     | 6.40                   | 28.00               | 16.67               | 1.80                  | 638             | S + PAT                  |
| CONO1            | 21.6    | 71.00             | 3.33                      | 3.00                                | 5.67                     | 7.30                   | 27.83               | 17.83               | 2.05                  | 414             | S + PAT                  |
| DPI00904         | 42.4    | 85.00             | 2.67                      | 2.00                                | 5.00                     | 6.90                   | 32.67               | 14.00               | 3.54                  | 481             | S + PAT                  |
| GPU26            | 20.8    | 66.20             | 1.67                      | 1.33                                | 4.67                     | 5.23                   | 25.00               | 18.17               | 1.45                  | 737             | S + PAT                  |
| GPU28            | 4       | 106.60            | 2.21                      | 2.00                                | 6.30                     | 9.10                   | 39.30               | 22.60               | 3.19                  | 207.5           | R +GAT                   |
| GPU45            | 15.2    | 110.30            | 2.67                      | 1.67                                | 5.67                     | 8.30                   | 25.67               | 18.17               | 1.38                  | 428             | S + PAT                  |
| GPU46            | 17.6    | 66.33             | 2.67                      | 2.33                                | 6.33                     | 6.93                   | 26.67               | 16.17               | 1.64                  | 509             | S + PAT                  |
| GPU48            | 15.2    | 44.33             | 1.33                      | 1.33                                | 3.67                     | 4.50                   | 20.67               | 18.33               | 6.30                  | 716             | S + PAT                  |
| GPU66            | 6.4     | 56.33             | 1.33                      | 1.33                                | 5.00                     | 6.07                   | 21.00               | 15.03               | 3.42                  | 700.5           | S + PAT                  |
| GPU67            | 4.8     | 34.33             | 2.33                      | 1.33                                | 3.67                     | 3.37                   | 18.50               | 11.03               | 8.00                  | 752.5           | R +PAT                   |
| HOSURI           | 39.2    | 47.33             | 3.33                      | 0.67                                | 3.33                     | 3.83                   | 32.83               | 20.37               | 3.25                  | 627.5           | S + PAT                  |
| HR374            | 99.6    | 80.59             | 3.00                      | 2.22                                | 7.00                     | 10.10                  | 33.00               | 17.89               | 5.80                  | 325.5           | S + GAT                  |
| HR911            | 67.2    | 40.00             | 1.00                      | 1.00                                | 3.67                     | 5.27                   | 16.33               | 17.70               | 2.60                  | 899.5           | S + PAT                  |

| Name of genotype | PDI (%) | Plant height (cm) | Number of tillers / plant | Number of productive tillers / plan | Number of fingers / head | Length of fingers (cm) | Length of leaf (cm) | Length of root (cm) | Total seed yield (gm) | Cumulative rank | Empirical classification |
|------------------|---------|-------------------|---------------------------|-------------------------------------|--------------------------|------------------------|---------------------|---------------------|-----------------------|-----------------|--------------------------|
|                  |         |                   |                           |                                     |                          |                        |                     |                     |                       |                 |                          |
| IE1055           | 44.8    | 79.83             | 1.33                      | 1.33                                | 5.33                     | 5.83                   | 22.67               | 16.83               | 1.20                  | 782             | S + PAT                  |
| IE2034           | 38.4    | 42.33             | 3.00                      | 3.00                                | 5.00                     | 4.50                   | 37.00               | 17.33               | 1.20                  | 599             | S + PAT                  |
| IE2042           | 44      | 71.67             | 3.33                      | 3.00                                | 7.00                     | 6.50                   | 22.17               | 23.23               | 2.14                  | 432             | S + GAT                  |
| IE2043           | 56      | 69.00             | 2.33                      | 2.00                                | 8.00                     | 4.40                   | 20.67               | 16.50               | 1.25                  | 705.5           | S + PAT                  |
| IE2217           | 67.2    | 71.67             | 1.67                      | 1.67                                | 7.00                     | 6.17                   | 27.33               | 18.43               | 3.00                  | 577.5           | S + PAT                  |
| IE2296           | 51.2    | 62.33             | 2.33                      | 2.00                                | 6.33                     | 6.33                   | 30.53               | 16.47               | 1.25                  | 636             | S + PAT                  |
| IE2312           | 52.8    | 70.67             | 1.67                      | 1.00                                | 4.00                     | 5.70                   | 22.50               | 16.83               | 2.43                  | 800             | S + PAT                  |
| IE2430           | 54.4    | 76.33             | 1.67                      | 1.67                                | 5.33                     | 5.23                   | 28.17               | 13.67               | 1.20                  | 798             | S + PAT                  |
| IE2437           | 32      | 98.67             | 1.67                      | 1.33                                | 4.67                     | 5.20                   | 31.33               | 17.17               | 2.41                  | 614             | S + PAT                  |
| IE2457           | 64      | 99.33             | 3.33                      | 0.67                                | 1.00                     | 1.80                   | 38.17               | 17.87               | 2.35                  | 640             | S + PAT                  |
| IE2572           | 55.2    | 57.33             | 1.33                      | 2.00                                | 1.20                     | 1.70                   | 44.33               | 24.40               | 1.50                  | 740             | S + PAT                  |
| IE2589           | 44.8    | 80.53             | 2.33                      | 1.67                                | 4.33                     | 5.67                   | 25.67               | 19.67               | 3.13                  | 574             | S + PAT                  |
| IE2606           | 24.8    | 64.67             | 2.67                      | 1.67                                | 4.33                     | 5.67                   | 38.67               | 14.50               | 2.13                  | 611             | S + PAT                  |
| IE2619           | 38.4    | 83.00             | 2.67                      | 1.67                                | 4.33                     | 3.30                   | 31.00               | 23.33               | 0.85                  | 613.5           | S + PAT                  |
| IE2710           | 16      | 56.67             | 3.00                      | 1.68                                | 1.20                     | 1.70                   | 45.00               | 11.67               | 3.47                  | 612             | S + PAT                  |
| IE2790           | 25.6    | 86.67             | 3.33                      | 1.68                                | 1.20                     | 1.70                   | 44.33               | 19.50               | 4.45                  | 434             | S + PAT                  |
| IE2821           | 63.2    | 99.00             | 2.67                      | 1.67                                | 5.67                     | 4.50                   | 33.33               | 18.33               | 1.97                  | 527             | S + PAT                  |
| IE2871           | 14.4    | 73.33             | 2.33                      | 0.67                                | 1.67                     | 2.50                   | 43.87               | 18.00               | 2.44                  | 606.5           | S + PAT                  |
| IE2872           | 8       | 86.33             | 1.67                      | 1.67                                | 6.00                     | 4.53                   | 33.67               | 17.83               | 2.41                  | 482.5           | S + PAT                  |
| IE2911           | 16.8    | 52.00             | 2.67                      | 4.00                                | 7.00                     | 6.17                   | 40.33               | 15.67               | 3.11                  | 386.5           | S + PAT                  |
| IE2957           | 20      | 86.00             | 3.33                      | 3.00                                | 6.50                     | 6.17                   | 46.33               | 19.00               | 2.75                  | 250.5           | S + GAT                  |

| Name of genotype | PDI (%) | Plant height (cm) | Number of tillers / plant | Number of productive tillers / pan | Number of fingers / head | Length of fingers (cm) | Length of leaf (cm) | Length of root (cm) | Total seed yield (gm) | Cumulative rank | Empirical classification |
|------------------|---------|-------------------|---------------------------|------------------------------------|--------------------------|------------------------|---------------------|---------------------|-----------------------|-----------------|--------------------------|
|                  |         |                   |                           |                                    |                          |                        |                     |                     |                       |                 |                          |
| IE3045           | 20      | 89.00             | 1.33                      | 1.33                               | 4.00                     | 7.00                   | 25.87               | 15.67               | 1.55                  | 686.5           | S + PAT                  |
| IE3077           | 20      | 91.33             | 1.33                      | 1.33                               | 4.67                     | 4.83                   | 31.00               | 16.83               | 3.11                  | 597.5           | S + PAT                  |
| IE3104           | 41.6    | 54.00             | 2.33                      | 2.33                               | 9.33                     | 5.23                   | 31.00               | 16.57               | 2.75                  | 541.5           | S + PAT                  |
| IE3317           | 31.2    | 53.00             | 2.00                      | 0.67                               | 3.33                     | 3.67                   | 31.00               | 16.83               | 3.33                  | 749.5           | S + PAT                  |
| IE3391           | 30.4    | 50.00             | 2.67                      | 1.33                               | 4.33                     | 4.00                   | 31.67               | 15.00               | 1.36                  | 763.5           | S + PAT                  |
| IE3392           | 49.6    | 56.67             | 1.67                      | 1.67                               | 5.33                     | 4.03                   | 28.50               | 22.17               | 2.38                  | 685.5           | S + PAT                  |
| IE3470           | 14.4    | 77.00             | 5.00                      | 4.00                               | 7.00                     | 6.17                   | 29.33               | 15.23               | 4.30                  | 327             | S + GAT                  |
| IE3475           | 18.4    | 65.33             | 2.67                      | 1.00                               | 5.00                     | 6.43                   | 28.67               | 12.63               | 4.20                  | 594             | S + PAT                  |
| IE3614           | 48.8    | 65.67             | 2.67                      | 2.33                               | 6.33                     | 6.50                   | 25.17               | 16.67               | 2.50                  | 549.5           | S + PAT                  |
| IE3618           | 25.6    | 62.33             | 2.33                      | 2.00                               | 6.33                     | 5.68                   | 23.00               | 14.17               | 3.20                  | 608             | S + PAT                  |
| IE3721           | 30.4    | 56.00             | 1.67                      | 2.45                               | 2.48                     | 5.65                   | 43.00               | 13.83               | 4.50                  | 616.5           | S + PAT                  |
| IE3945           | 40.8    | 60.33             | 1.33                      | 1.00                               | 2.67                     | 1.80                   | 33.00               | 15.17               | 1.50                  | 895.5           | S + PAT                  |
| IE3952           | 28.8    | 66.00             | 1.67                      | 2.47                               | 3.00                     | 4.50                   | 42.53               | 19.50               | 1.70                  | 605             | S + PAT                  |
| IE3973           | 33.6    | 77.67             | 2.33                      | 2.33                               | 4.33                     | 4.20                   | 31.67               | 17.17               | 1.95                  | 592.5           | S + PAT                  |
| IE4028           | 18.4    | 82.67             | 2.67                      | 2.33                               | 7.00                     | 6.33                   | 31.77               | 17.67               | 2.05                  | 374.5           | S + PAT                  |
| IE4057           | 21.6    | 60.33             | 2.00                      | 2.33                               | 7.00                     | 6.33                   | 32.37               | 19.00               | 1.70                  | 476             | S + PAT                  |
| IE4073           | 36.8    | 87.67             | 2.00                      | 1.33                               | 3.33                     | 4.83                   | 32.80               | 14.90               | 2.60                  | 669             | S + PAT                  |
| IE4121           | 10.4    | 104.67            | 2.33                      | 2.33                               | 4.67                     | 5.43                   | 28.67               | 19.67               | 1.64                  | 449             | S + PAT                  |
| IE4329           | 17.6    | 103.67            | 2.00                      | 1.67                               | 4.33                     | 7.03                   | 28.83               | 22.00               | 1.28                  | 488.5           | S + PAT                  |
| IE4491           | 16      | 98.53             | 2.67                      | 2.33                               | 5.00                     | 7.17                   | 25.67               | 18.83               | 2.30                  | 395             | S + PAT                  |
| IE4497           | 12      | 96.00             | 1.67                      | 1.67                               | 4.00                     | 7.53                   | 30.33               | 17.83               | 4.00                  | 440.5           | S + PAT                  |



| Name of genotype | PDI (%) | Plant height (cm) | Number of tillers / plant | Number of productive tillers / plan | Number of fingers / head | Length of fingers (cm) | Length of leaf (cm) | Length of root (cm) | Total seed yield (gm) | Cumulative rank | Empirical classification |
|------------------|---------|-------------------|---------------------------|-------------------------------------|--------------------------|------------------------|---------------------|---------------------|-----------------------|-----------------|--------------------------|
|                  |         |                   |                           |                                     |                          |                        |                     |                     |                       |                 |                          |
| IE4545           | 43.2    | 82.33             | 2.00                      | 1.33                                | 6.00                     | 6.67                   | 27.33               | 15.33               | 2.00                  | 639             | S + PAT                  |
| IE4565           | 21.6    | 65.33             | 2.33                      | 1.00                                | 5.33                     | 7.50                   | 30.50               | 14.50               | 3.75                  | 569.5           | S + PAT                  |
| IE4570           | 11.2    | 79.00             | 2.00                      | 1.67                                | 6.67                     | 4.50                   | 24.20               | 14.33               | 4.20                  | 567             | S + PAT                  |
| IE4622           | 28      | 87.33             | 1.67                      | 1.00                                | 5.00                     | 6.03                   | 24.67               | 19.00               | 1.56                  | 666             | S + PAT                  |
| IE4646           | 28.8    | 80.00             | 2.33                      | 1.33                                | 4.67                     | 6.30                   | 25.13               | 17.00               | 3.63                  | 572             | S + PAT                  |
| IE4671           | 19.2    | 99.00             | 3.00                      | 2.67                                | 7.67                     | 6.50                   | 36.80               | 14.33               | 2.35                  | 325.5           | S + PAT                  |
| IE4673           | 12.8    | 82.00             | 3.00                      | 1.67                                | 4.33                     | 4.50                   | 32.67               | 17.00               | 2.80                  | 477             | S + PAT                  |
| IE4709           | 28.8    | 70.00             | 3.67                      | 3.00                                | 6.33                     | 8.00                   | 32.00               | 18.67               | 5.33                  | 276.5           | S + GAT                  |
| IE4734           | 2       | 78.33             | 1.67                      | 1.33                                | 3.67                     | 3.67                   | 23.67               | 20.83               | 2.85                  | 624             | R + PAT                  |
| IE4757           | 5.6     | 104.67            | 2.00                      | 1.67                                | 6.00                     | 7.33                   | 31.67               | 18.00               | 4.00                  | 319             | S + PAT                  |
| IE4795           | 1       | 106.00            | 3.67                      | 3.00                                | 7.00                     | 9.00                   | 41.00               | 16.67               | 3.90                  | 138             | R + GAT                  |
| IE4797           | 45.6    | 45.00             | 1.67                      | 3.00                                | 7.00                     | 9.00                   | 33.33               | 15.17               | 2.75                  | 529             | S + PAT                  |
| IE4816           | 41.6    | 43.00             | 1.67                      | 3.00                                | 7.00                     | 9.00                   | 36.33               | 15.57               | 2.85                  | 498.5           | S + PAT                  |
| IE501            | 38.4    | 55.67             | 1.33                      | 1.33                                | 3.67                     | 3.67                   | 28.83               | 19.90               | 2.17                  | 774             | S + PAT                  |
| IE5066           | 33.6    | 66.67             | 2.33                      | 1.33                                | 3.67                     | 3.67                   | 36.67               | 12.67               | 2.13                  | 734             | S + PAT                  |
| IE5091           | 22.4    | 65.67             | 2.33                      | 0.33                                | 1.33                     | 1.83                   | 32.33               | 15.67               | 1.28                  | 807             | S + PAT                  |
| IE5106           | 15.2    | 84.67             | 3.00                      | 0.67                                | 1.67                     | 1.80                   | 33.67               | 17.17               | 1.72                  | 626.5           | S + PAT                  |
| IE518            | 42.4    | 69.83             | 2.00                      | 2.00                                | 7.00                     | 4.57                   | 25.03               | 15.97               | 2.35                  | 653.5           | S + PAT                  |
| IE5201           | 28.8    | 92.00             | 3.67                      | 3.33                                | 7.67                     | 4.83                   | 23.00               | 16.83               | 2.19                  | 436             | S + PAT                  |
| IE5306           | 28      | 67.00             | 1.33                      | 1.33                                | 4.33                     | 5.03                   | 20.67               | 16.50               | 1.90                  | 816.5           | S + PAT                  |
| IE5367           | 21.6    | 46.33             | 2.00                      | 1.00                                | 4.33                     | 6.00                   | 20.33               | 16.00               | 3.43                  | 741.5           | S + PAT                  |

| Name of genotype | PDI (%) | Plant height (cm) | Number of tillers / plant | Number of productive tillers / plan | Number of fingers / head | Length of fingers (cm) | Length of leaf (cm) | Length of root (cm) | Total seed yield (gm) | Cumulative rank | Empirical classification |
|------------------|---------|-------------------|---------------------------|-------------------------------------|--------------------------|------------------------|---------------------|---------------------|-----------------------|-----------------|--------------------------|
|                  |         |                   |                           |                                     |                          |                        |                     |                     |                       |                 |                          |
| IE5537           | 33.6    | 59.33             | 2.33                      | 1.33                                | 5.67                     | 6.00                   | 22.33               | 14.17               | 2.55                  | 715             | S + PAT                  |
| IE5817           | 36.8    | 54.67             | 2.67                      | 0.33                                | 1.00                     | 1.67                   | 30.67               | 15.30               | 3.70                  | 784.5           | S + PAT                  |
| IE5870           | 44.8    | 67.00             | 1.00                      | 1.00                                | 5.00                     | 3.33                   | 20.67               | 16.17               | 1.25                  | 926.5           | S + PAT                  |
| IE6059           | 47.2    | 75.00             | 2.67                      | 2.67                                | 7.00                     | 7.50                   | 31.00               | 17.47               | 2.33                  | 418             | S + GAT                  |
| IE6082           | 34.4    | 73.00             | 2.00                      | 1.67                                | 4.67                     | 3.83                   | 24.67               | 11.83               | 1.73                  | 800             | S + PAT                  |
| IE6154           | 7.2     | 73.00             | 2.67                      | 2.00                                | 6.00                     | 5.67                   | 25.67               | 14.50               | 1.91                  | 561             | S + PAT                  |
| IE6165           | 4.8     | 83.33             | 2.33                      | 2.33                                | 6.67                     | 6.33                   | 30.00               | 16.50               | 2.05                  | 418.5           | R + PAT                  |
| IE6221           | 32.8    | 99.00             | 2.00                      | 1.67                                | 7.33                     | 5.33                   | 33.33               | 14.43               | 2.04                  | 536.5           | S + PAT                  |
| IE6240           | 35.2    | 77.33             | 2.00                      | 2.00                                | 5.00                     | 5.73                   | 32.00               | 16.33               | 1.17                  | 638.5           | S + PAT                  |
| IE6294           | 39.2    | 100.00            | 3.33                      | 2.67                                | 6.67                     | 6.47                   | 31.67               | 20.33               | 1.19                  | 372.5           | S + PAT                  |
| IE6326           | 8       | 103.67            | 4.33                      | 3.67                                | 7.00                     | 5.30                   | 33.00               | 15.50               | 1.65                  | 345.5           | S + PAT                  |
| IE6337           | 13.6    | 74.67             | 2.00                      | 1.33                                | 5.33                     | 5.50                   | 31.00               | 20.33               | 1.20                  | 579.5           | S + PAT                  |
| IE6350           | 26.4    | 89.00             | 2.33                      | 1.67                                | 7.00                     | 3.50                   | 27.33               | 21.83               | 1.89                  | 509             | S + PAT                  |
| IE6421           | 13.6    | 96.33             | 1.67                      | 1.67                                | 4.67                     | 5.50                   | 27.67               | 16.23               | 3.22                  | 552.5           | S + PAT                  |
| IE6473           | 21.6    | 89.00             | 2.67                      | 1.67                                | 6.33                     | 6.57                   | 34.33               | 14.67               | 1.27                  | 481.5           | S + PAT                  |
| IE6514           | 24      | 83.67             | 2.67                      | 1.33                                | 6.67                     | 6.40                   | 31.00               | 15.00               | 1.55                  | 544             | S + PAT                  |
| IE6537           | 32      | 68.00             | 2.00                      | 1.33                                | 6.87                     | 6.40                   | 34.33               | 17.67               | 4.20                  | 473             | S + PAT                  |
| IE7018           | 10.4    | 76.33             | 3.00                      | 0.67                                | 1.67                     | 1.83                   | 40.33               | 12.67               | 1.95                  | 674.5           | S + PAT                  |
| IE7079           | 1.5     | 81.67             | 2.67                      | 1.00                                | 2.33                     | 2.67                   | 26.67               | 12.50               | 2.00                  | 721.5           | R + PAT                  |
| IE7320           | 17.6    | 100.00            | 3.00                      | 2.67                                | 6.00                     | 5.33                   | 26.67               | 15.40               | 2.06                  | 455.5           | S + PAT                  |
| INDOF5           | 76.8    | 57.87             | 1.00                      | 1.00                                | 4.00                     | 5.67                   | 19.40               | 15.17               | 2.90                  | 903.5           | S + PAT                  |

| Name of genotype | PDI (%) | Plant height (cm) | Number of tillers / plant | Number of productive tillers / plan | Number of fingers / head | Length of fingers (cm) | Length of leaf (cm) | Length of root (cm) | Total seed yield (gm) | Cumulative rank | Empirical classification |
|------------------|---------|-------------------|---------------------------|-------------------------------------|--------------------------|------------------------|---------------------|---------------------|-----------------------|-----------------|--------------------------|
|                  |         |                   |                           |                                     |                          |                        |                     |                     |                       |                 |                          |
| INDOF7           | 24      | 60.00             | 2.00                      | 0.33                                | 1.33                     | 3.17                   | 32.17               | 13.50               | 2.15                  | 834.5           | S + PAT                  |
| INDOF8           | 69.6    | 75.00             | 2.33                      | 2.33                                | 4.67                     | 6.17                   | 26.33               | 19.33               | 2.79                  | 557.5           | S + PAT                  |
| INDOF9           | 68      | 77.17             | 2.33                      | 2.00                                | 5.67                     | 6.83                   | 33.83               | 18.00               | 3.55                  | 443.5           | S + GAT                  |
| KM252            | 70.4    | 103.60            | 2.26                      | 2.00                                | 5.60                     | 5.90                   | 30.10               | 18.10               | 4.00                  | 477             | S + PAT                  |
| KM301            | 73.6    | 73.67             | 2.00                      | 1.33                                | 5.00                     | 6.50                   | 26.33               | 16.33               | 1.90                  | 727.5           | S + PAT                  |
| KRI00701         | 17.6    | 108.00            | 2.00                      | 2.00                                | 7.00                     | 6.80                   | 26.67               | 15.33               | 3.83                  | 400.5           | S + PAT                  |
| KRI1311          | 27.2    | 64.67             | 2.00                      | 2.00                                | 5.00                     | 5.57                   | 23.67               | 14.50               | 2.17                  | 711             | S + PAT                  |
| L5               | 48      | 69.33             | 1.00                      | 1.00                                | 5.67                     | 5.97                   | 31.00               | 18.83               | 3.15                  | 646             | S + PAT                  |
| ML365            | 58.4    | 92.17             | 1.67                      | 1.33                                | 5.33                     | 7.30                   | 27.00               | 19.17               | 1.78                  | 607.5           | S + PAT                  |
| MR1              | 51.2    | 82.00             | 1.67                      | 1.33                                | 5.00                     | 7.57                   | 29.53               | 17.50               | 3.20                  | 572.5           | S + PAT                  |
| MR2              | 59.2    | 69.00             | 3.00                      | 2.00                                | 6.00                     | 8.00                   | 42.67               | 16.07               | 3.00                  | 438.5           | S + GAT                  |
| MR6              | 51.2    | 80.50             | 1.33                      | 1.33                                | 6.00                     | 7.17                   | 29.50               | 19.67               | 1.10                  | 635.5           | S + PAT                  |
| PAIYUR2          | 11.2    | 110.30            | 2.30                      | 2.3                                 | 6.00                     | 6.4                    | 26.3                | 19.5                | 2.46                  | 369             | S + PAT                  |
| PES110           | 65.6    | 99.33             | 3.00                      | 2.33                                | 6.00                     | 7.00                   | 32.00               | 17.87               | 2.65                  | 381.5           | S + GAT                  |
| PR202            | 39.2    | 69.00             | 1.67                      | 1.33                                | 5.67                     | 6.00                   | 28.33               | 14.33               | 2.50                  | 711.5           | S + PAT                  |
| RAU8             | 81.6    | 84.60             | 2.04                      | 1.30                                | 5.60                     | 6.70                   | 29.30               | 16.60               | 8.40                  | 566.5           | S + PAT                  |
| SVK1             | 53.6    | 93.17             | 3.33                      | 2.33                                | 5.33                     | 9.70                   | 35.20               | 25.33               | 5.70                  | 256.5           | S + GAT                  |
| TCHIN1           | 47.2    | 71.67             | 2.33                      | 0.33                                | 1.67                     | 1.83                   | 41.67               | 18.33               | 2.65                  | 685.5           | S + PAT                  |
| TCUM1            | 15.2    | 75.67             | 3.67                      | 2.00                                | 4.33                     | 5.67                   | 26.33               | 16.83               | 2.75                  | 499.5           | S + PAT                  |
| THRP1            | 40.8    | 65.67             | 1.67                      | 1.33                                | 8.33                     | 4.67                   | 30.50               | 15.83               | 1.25                  | 728.5           | S + PAT                  |
| THRVP            | 20.8    | 88.33             | 1.00                      | 1.00                                | 3.33                     | 6.30                   | 28.33               | 17.17               | 3.10                  | 637.5           | S + PAT                  |

| Name of genotype | PDI (%) | Plant height (cm) | Number of tillers / plant | Number of productive tillers / plan | Number of fingers / head | Length of fingers (cm) | Length of leaf (cm) | Length of root (cm) | Total seed yield (gm) | Cumulative rank | Empirical classification |
|------------------|---------|-------------------|---------------------------|-------------------------------------|--------------------------|------------------------|---------------------|---------------------|-----------------------|-----------------|--------------------------|
| THRVPP           | 31.2    | 88.67             | 1.67                      | 0.67                                | 3.00                     | 5.10                   | 39.83               | 19.00               | 2.41                  | 618             | S + PAT                  |
| TRY1             | 38.4    | 49.00             | 2.00                      | 1.33                                | 4.67                     | 6.83                   | 22.67               | 17.83               | 2.50                  | 697.5           | S + PAT                  |
| VIJAYAWADA       | 71.2    | 70.33             | 1.33                      | 1.00                                | 6.00                     | 5.70                   | 34.33               | 20.90               | 1.80                  | 660             | S + PAT                  |
| VL149            | 58.4    | 71.00             | 2.00                      | 2.00                                | 7.67                     | 7.17                   | 26.33               | 16.90               | 1.65                  | 584.5           | S + PAT                  |
| VR708            | 61.6    | 45.33             | 1.67                      | 1.67                                | 6.67                     | 4.23                   | 22.17               | 20.00               | 2.83                  | 704             | S + PAT                  |

PDI- 0% is highly resistant, 1% is resistant, 1.1-5% is moderately resistant, 5.1-25% is moderately susceptible, 25.1 to 50% is susceptible and 50.1 to 100% is highly susceptible. Data on agronomic traits were recorded from 3 representative plants randomly from each row for each genotype and mean value was calculated. Based on empirical classification; three genotypes are resistance with good agronomic traits (R + GATs), ten genotypes are susceptible with good agronomic traits (S + GATs), four genotypes are resistance with poor agronomic traits (R + PATs), and 111 genotypes are susceptible and poor agronomic traits (S + PATs).
